# Supplementary material
Source: PubMed Central journal article supplement (PMC2735486)
Supplement: E09-01-0038_1.pdf [file E09-01-0038_1.pdf]

## Suppl Figure 1

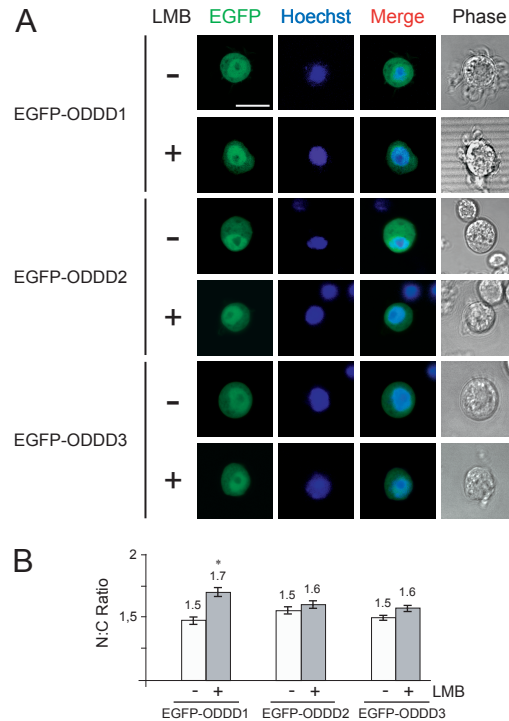

**Supplemental Figure 1:** (A) The ODDD was divided into 3 fragments, which were fused to EGFP and transfected to S2 cells for analysis of subcellular localization and sensitivity to LMB. Whereas EGFP-ODDD1 (aa 669-730) became clearly more nuclear upon LMB treatment, EGFP-ODDD2 (aa 725-803) and EGFP-ODDD3 (aa 797-870) were unaffected by LMB, indicating the occurrence of a CRM1-dependent NES in ODDD1. (B) Quantification of the results shown in (A); the Nuclear: Cytoplasmic ratio (N:C) is depicted. T Student test (\*,  $P < 10^{-7}$ ;  $N > 20$ ).

## Suppl. Figure 2

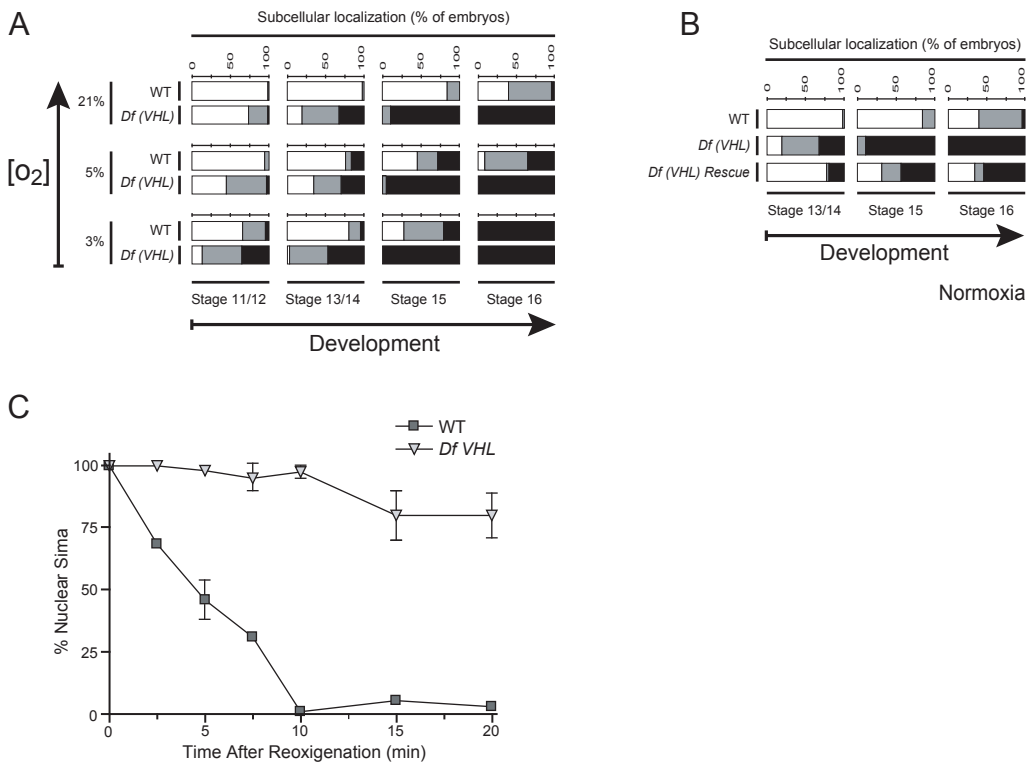

### Supplemental Figure 2- VHL loss of function embryos exhibit impaired Sima

**nuclear export:** (A) In embryos homozygous for the chromosomal deficiency

Df(2R)en-A, that includes the VHL gene (Df(VHL)), Sima was more nuclear than in wild type (y w) controls at all tested oxygen levels throughout embryogenesis ( $P < 10^{-4}$ ;  $N > 40$ ).

Black color: “Nuclear”; Grey: “Ubiquitous”; White: “Cytoplasmic”. (B) Wild type subcellular localization of Sima was partially restored upon ectopic expression of Drosophila VHL in Df(2R)en-A homozygous embryos, suggesting that VHL loss-of-function accounts for the nuclear localization of Sima occurring in embryos

homozygous for the deficiency (A). (C) Sima nuclear export assay upon re-oxygenation

reveals that export is severely impaired in embryos homozygous for the Df(2R)en-A

chromosomal deficiency (Df(VHL)) (Kaplan-Meier;  $p < 10^{-4}$ ;  $n > 30$ ).
